# Supplementary material for: Co-infection of a hypovirulent isolate of Sclerotinia sclerotiorum with a new botybirnavirus and a strain of a mitovirus
Source: Virol J. 2016 Jun 6;13:92. doi: 10.1186/s12985-016-0550-2 (PMC4895950; doi:10.1186/s12985-016-0550-2)
Supplement: Additional file 1: Figure S1. — Multiple alignments of conserved RdRp amino acid motifs of SsBRV2 and its relation viruses. Eight motifs (I–VIII) were shown by black lines above RdRp conserved motif sequences. Asterisks, colons and dots represent identical residues, conserved and semi-conserved amino acid residues, respectively. The number of amino acid residues of two separating the motifs is shown in square brackets. (PDF 121 kb) [file 12985_2016_550_MOESM1_ESM.pdf]

|         | <u>Motif I</u> | <u>Motif II</u> | <u>Motif III</u>             | <u>Motif IV</u>  | <u>Motif V</u>  |
|---------|----------------|-----------------|------------------------------|------------------|-----------------|
| SsBRV2  | LVGRP (67)     | WM-IGGS (59)    | KGNE-NG-KL—RAIYGSLSFSQY (47) | LDYTDFNASHS (55) | KGRGEYLRL (09)  |
| SsBRV1  | FVGRP (67)     | WM-IKGS (59)    | KGQE-NG-KI—RSIQGSCYSHY (48)  | ADYPDFGATHS (55) | SISSEYLRE (08)  |
| SlabRV1 | LVGRP (67)     | WM-IKGS (59)    | KGQE-NA-KI—RSIQASLYSHY (48)  | LDYPDFGATHS (55) | RMGSEYLRE (09)  |
| BpRV1   | MVGRP (67)     | WM-IKGS (59)    | KGNE-HG-KV—RAIYGSLYAHY (47)  | LDYADFNAQHS (55) | QKGGEYLRL (09)  |
| ScV-L-A | LMNRG (60)     | WV-PGGS (49)    | KYEW—G-KQ—RAIYGTDLRST (44)   | FDYDDFNSQHS (52) | -SISEFLRV (12)  |
| UmV-H1  | LYGRG (66)     | WL-VSGS (58)    | KLNETGG-KA—RAIYGVTLWHY (47)  | YDYPDFNSMHT (64) | HKHHEYLRI (09)  |
| HvV145S | LLGRR (73)     | WM-TKGS (61)    | KLNENGH-KD—RVLLPGGLLHY (44)  | YDWANFNVQHS (49) | -RNSEFFRV (08)  |
| RnMBV1  | ALGRF (72)     | FG-SSGS (46)    | KREA—G-KL—RQLLPGRIPHW (48)   | VDWADFNITHT (69) | GEMGEFLRH (08)  |
| SpFV1   | LTGRS (91)     | WI-ASGS (58)    | KYEN—G-KA—RAIYGVPEPMHY (49)  | LDYADFNRHHT (53) | PGRGEYLRLV (08) |
|         | . *            | : **            | * * *                        | *: *: *          | *. **           |

|         | <u>Motif VI</u>             | <u>Motif VII</u> | <u>Motif VIII</u>            |
|---------|-----------------------------|------------------|------------------------------|
| SsBRV2  | GLFSGLPQTTFDNTVANLTYD (19)  | YVLGDDGWVSF (18) | ETNEIKQ-----LIS GSPLRALANIC  |
| SsBRV1  | GMFSGVVQTTLINTVMNGALR (19)  | FELGDDGWAEF (18) | ELNSLKQ-----LIS GCASRALAMLV  |
| SlabRV1 | GMFSGVVQTTLFNTVLNGLALR (19) | YELGDDGWALF (18) | QLNPLKQ-----LVS GCPLRALAMLV  |
| BpRV1   | GMFSGVRQTTLINTILNLTYH (19)  | YVLGDDGWVEF (18) | EINAIKQ-----LIG GCPVRSLASFV  |
| ScV-L-A | TLLSGWRLTTFMNTVLNWAYM (14)  | VHNGDDVMISL (18) | RAQPAKC-----NLF QYLSRSCATLV  |
| UmV-H1  | GLYSGDRDTTLINTLLNIAYA (19)  | LCHGDDIITVH (18) | KGQESKL-----MID) GCLARCVATYV |
| HvV145S | GLYSGWRGTTWDNTVLNGCYM (19)  | DQGGDDVDQEF (18) | EATKSKQ-----MIG ASPVRGLATFV  |
| RnMBV1  | GLWSGWRTTSFINCSFNVAYC (19)  | VHAGDDFFGTY (18) | EVNAQKQ-----LVG GSVMRSIGSFV  |
| SpFV1   | GMFSGTRSTDINTLLNLAYF (20)   | VHQGDDVWVSN (18) | IFQGSKQ-----MFG GYFARSLANYL  |
|         | : ** * * *                  | ***              | * *                          |
