# Supplementary material for: Co-infection of a hypovirulent isolate of Sclerotinia sclerotiorum with a new botybirnavirus and a strain of a mitovirus
Source: Springer Nature journal article supplement (doi:10.1186/s12985-016-0550-2), 2016-06-06
Supplement: MOESM2 [file 10244698]

**A**

|          |                                                               |     |
|----------|---------------------------------------------------------------|-----|
| L1-dsRNA | GCAATAAAAGGTGCGGCTTGCCTTTTGTGTTATTTTAAAAATTAAGCCAAAAACACGGTC  | 60  |
| L2-dsRNA | GCAATAAAAGGTGCGGCTTGCCTTTTGTGTTATTTTAAAAATTAAGCCAAAAACACGGTC  | 59  |
| L1-dsRNA | AATTCATGTTGAAGATACACTATCTAGTGTAGATTCTTGGATTGGTAAGACCAGTCGAG   | 120 |
| L1-dsRNA | AATTCATGTTGAAAATACACTATCTAGTGTAGATTCTTGGATTGGTAAGACCAGTCGAG   | 119 |
| L1-dsRNA | TCAGTGACGCGTCTCGATTTCTGGAAGTCAAACCTAAACGGTAAATTGTAACCCCGGACC  | 180 |
| L2-dsRNA | TCAGTGACGCGTCTCGATTTCTGGAAGTCAAACCTAAACGGTAAATTGTAACCCCGGACC  | 179 |
| L1-dsRNA | CCCCAGTGACTGCAACGGTGGAGAGACTTGAGGCCGGTGATAAATGTCAAAGGGAACAG   | 240 |
| L2-dsRNA | CCCCAGTGACTGCAACGGTGGAGAGACTTGAGGCCGGTGATAAATGTCAAAGGGAACAG   | 239 |
| L1-dsRNA | CGACTGCCCCATCACCCAAAATCATTCTCTTGGTATATAAGACACATTACTGCAGGTGGG  | 300 |
| L2-dsRNA | CGACTGCCCCATCACCCAAAATCATTCTCTTGGTATATAAGACACATTACTGCAGGTGGG  | 299 |
| L1-dsRNA | TGGTCATTGCAAACGGAGCCAACATGCTCTGAGGGCTGGCGAAAGCTAGAGGACGTGGGC  | 360 |
| L2-dsRNA | TGGTCATTGCAAACGGAGCCAACATGCTCTGAGGGCTGGCGAAAGCTAGAGGACGTGGGC  | 359 |
| L1-dsRNA | AACACCCGGAATGGTGATCTATTCTCCCCTTATCATGCCGCAATGACCTGAATGCTACA   | 420 |
| L2-dsRNA | AACACCCGGAATGGTGATCTATTCTCCCCTTATCATGCCGCAATGACCTGAATGCTACA   | 419 |
| L1-dsRNA | CGACTTAAATATTATGGCTTCTTCAAACACAAACAACAGTGCACAGACTGTCTTCTCTGC  | 480 |
| L2-dsRNA | CGACTTAAATATTATGGCTTCTTCAAACACAAACAACAGTGCACAGACTGTCTTCTCTGC  | 479 |
| L1-dsRNA | AAACAACATCACTTCTCTGGAGTCTAAAACCTCCAACAACAATAAAGGCTAAGGCCAACAA | 540 |
| L2-dsRNA | AAACAACATCACTTCTCTGGAGTCTAAAACCTCCAACAACAATAAAGGCTAAGGCCAACAA | 539 |

**B**

|          |                                                                |      |
|----------|----------------------------------------------------------------|------|
| L1-dsRNA | TAATTACATGCAGTAATTAATCTCAGGAATTATAATTGAGGGTATTCCTCGTTTCGTAAAAT | 6142 |
| L2-dsRNA | TAAATACATGCAGTAATTAAGAAGGAATTATAATTGAGGGTATTCCTCGTTTCGTAAAAT   | 5855 |
| L1-dsRNA | TGGCGGAAACACAAAGC                                              | 6159 |
| L2-dsRNA | TGGCGGAAACACAAAGC                                              | 5872 |
