# Supplementary material for: Co-infection of a hypovirulent isolate of Sclerotinia sclerotiorum with a new botybirnavirus and a strain of a mitovirus
Source: Springer Nature journal article supplement (doi:10.1186/s12985-016-0550-2), 2016-06-06

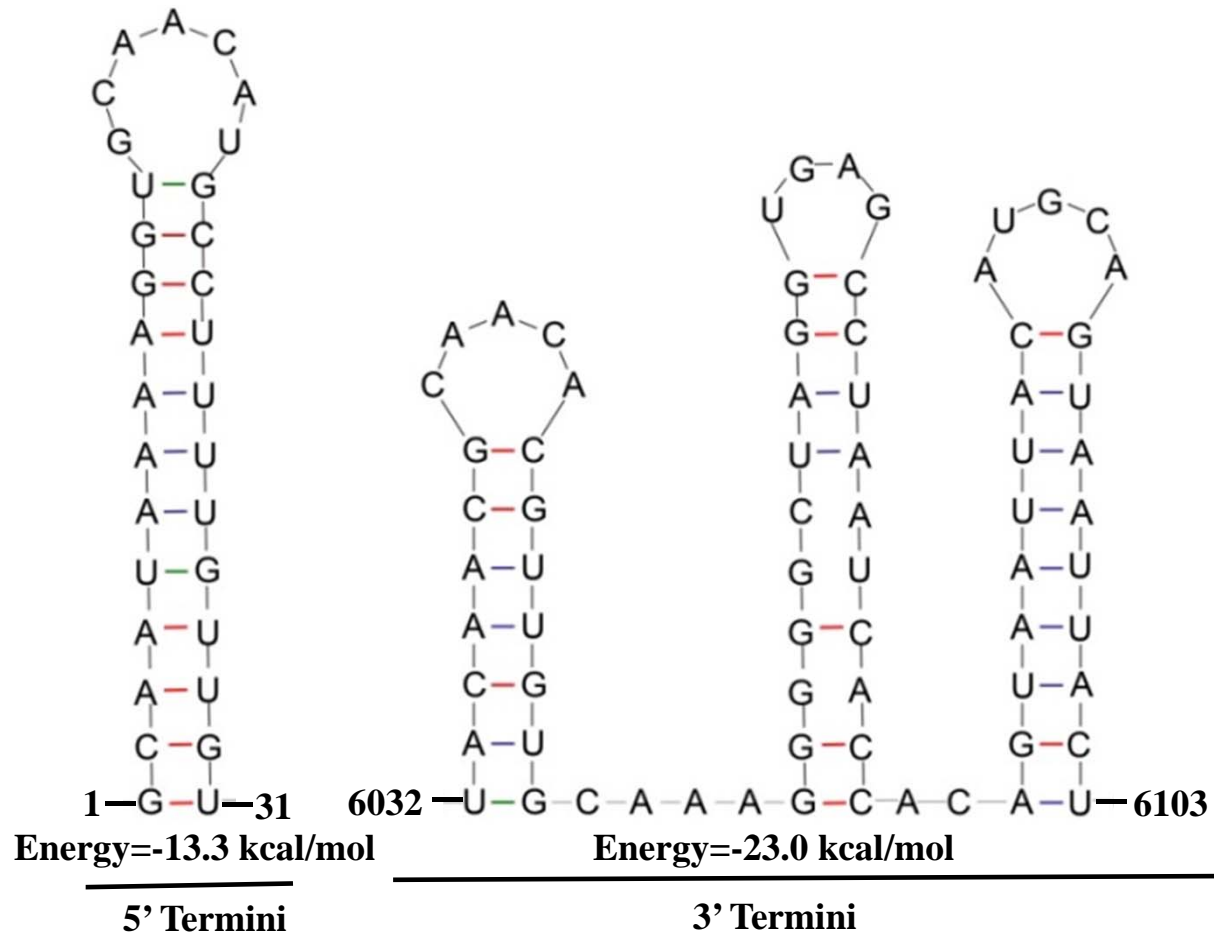

Supplement: MOESM3 [file 10244698]
